# Supplementary material for: Lanyamycin, a macrolide antibiotic from Sorangium cellulosum, strain Soce 481 (Myxobacteria)
Source: PubMed Central journal article supplement (PMC6037015; doi:10.3762/bjoc.14.132), 2018-06-26
Supplement: Beilstein_J_Org_Chem-14-1554-s001.pdf [file Beilstein_J_Org_Chem-14-1554-s001.pdf]

## Supporting Information

for

# Lanyamycin, a macrolide antibiotic from *Sorangium cellulosum*, strain Soce 481 (Myxobacteria)

Lucky S. Mulwa<sup>1,2</sup>, Rolf Jansen<sup>1</sup>, Dimas F. Praditya<sup>3</sup>, Kathrin I. Mohr<sup>1,2</sup>, Patrick W. Okanya<sup>4</sup>, Joachim Wink<sup>2</sup>, Eike Steinmann<sup>3,5</sup> and Marc Stadler<sup>1,\*§</sup>

Address: <sup>1</sup>Department of Microbial Drugs, Helmholtz Centre for Infection Research and German Centre for Infection Research (DZIF), partner site Hannover/Braunschweig, Inhoffenstrasse 7, 38124 Braunschweig, Germany, <sup>2</sup>Work group Microbial Strain Collection (MISG), Helmholtz Centre for Infection Research, Inhoffenstrasse 7, 38124 Braunschweig, Germany, <sup>3</sup>TWINCORE-Centre for Experimental and Clinical Infection Research (Institute of Experimental Virology) Hanover, Feodor-Lynen-Str. 7–9, 30625 Hannover, Germany. Tel: +49(0)511-220027-133, <sup>4</sup>Department of Biochemistry and Biotechnology, The Technical University of Kenya, P.O. Box 52428 – 00200, Located along Haile Selassie Avenue, Nairobi, Kenya. Tel: +254(020) 2219929 and <sup>5</sup>Department of Molecular and Medical Virology, Ruhr-University Bochum, 44801 Bochum, Germany

\* Corresponding author

Email: Marc Stadler - [marc.stadler@helmholtz-hzi.de](mailto:marc.stadler@helmholtz-hzi.de)

§Tel.: +49 531 6181-4240; Fax: +49 531 6181 9499

**Tables of NMR data and figures of the <sup>1</sup>H and <sup>13</sup>C NMR including the HCV infectivity results showing viability**

Table S1. NMR data of lanyamycin 1 in CD<sub>3</sub>OD (<sup>1</sup>H/<sup>13</sup>C NMR at 500.3/125.8 MHz)

| Pos.   | $\delta_c$ | type             | $\delta_H$ | H Mult. ( <i>J</i> [Hz])   | H in COSY       | H in N/ROESY                          | H to C HMBC        |
|--------|------------|------------------|------------|----------------------------|-----------------|---------------------------------------|--------------------|
| 1      | 166.06     | C=O              |            |                            |                 |                                       | 15, 3              |
| 2      | 143.04     | C                |            |                            |                 |                                       | 36, 3              |
| 3      | 133.63     | CH               | 6.53       | br s                       | 5               | 5 >>37, 42                            | 37, 5              |
| 4      | 132.61     | C                |            |                            |                 |                                       | 6                  |
| 5      | 147.62     | CH               | 5.38       | d (9.9)                    | 37, 6, 3        | 3 >7 >38, 8 >10                       | 38, 37, 6, 7, 3    |
| 6      | 39.67      | CH               | 2.39       | tq (10.0, 6.6)             | 38, 7, 5        | 37, (38) >8, 39                       | 38                 |
| 7      | 77.22      | CH               | 3.38       | br d (10.1)                | 6               | 5, 10 >9a, (8), 38 >11                | 39, 38, 9, 9, 6, 5 |
| 8      | 42.99      | CH               | 1.48       | m (9.8, 7.0, 3.1)          | 39, 9a, 9b      | (39) >5, 6, (7) >11                   | 39, 9, 9, 7        |
| 9a     | 38.78      | CH <sub>2</sub>  | 2.03       | m <sup>c</sup>             | 8, 9b, 10       | 39, 38, 9, 7, 11, 10                  | 39, 7, 11          |
| 9b     |            |                  | 1.88       | dd (14.5, 6.4)             | 8, 9a, 10       | 39, 8, 9, 11, 10                      | 39, 7, 11          |
| 10     | 138.29     | CH               | 6.16       | ddd (15.3, 9.5, 5.7)       | 9a, 9b, 11      | 8, 9, 9, 7, 5, 12                     | 11, 12             |
| 11     | 132.75     | CH               | 6.01       | dd (15.1, 10.4)            | 10, 12          | 8, 9, 9, 7, 13                        | 13, 10             |
| 12     | 139.79     | CH               | 6.50       | dd (15.2, 10.6)            | 13, 11          | 40, 14, 10                            | 14, 11, 10         |
| 13     | 128.95     | CH               | 5.17       | dd (15.1, 9.3)             | 14, 12          | 40, 14, 11                            | 11                 |
| 14     | 85.75      | CH               | 3.76       | t (9.5)                    | 15, 13          | 41, 16, 16, 40, 15, 13, 12, 17        | 40, 12             |
| 15     | 75.84      | CH               | 4.81       | ddd (9.8, 6.1, 4.1)        | 16a, 16b, 14    | 16, 16, 14, 17                        | 16, 14             |
| 16a    | 33.21      | CH <sub>2</sub>  | 2.86       | m <sup>a</sup>             | 41, 16b, 15, 17 | 41, 14, 15, 17                        | 14                 |
| 16b    |            |                  | 2.80       | m <sup>b</sup>             | 41, 16a, 15, 17 | 41, 14, 15                            | 14                 |
| 17     | 140.25     | CH               | 6.85       | br t (7.0)                 | 41, 16a, 16b    | 42, 20, 16, 20, 14, 21, 15            | 41, 16             |
| 18     | 140.58     | C                |            |                            |                 |                                       | 41, 20             |
| 19     | 202.54     | C=O              |            |                            |                 |                                       | 41, 20, 20, 17     |
| 20a    | 43.47      | CH <sub>2</sub>  | 2.98       | dd (15.5, 2.8)             | 20, 21          | 42, 20, 21, 17                        | 22                 |
| 20b    |            |                  | 2.77       | dd (15.6, 9.3)             | 20, 21          | 42, 24, 20, 17                        | 22                 |
| 21     | 72.40      | CH               | 4.24       | ddd (9.3, 8.0, 2.7)        | 20a, 20b, 22    | 42, 20, 17                            | 42, 20, 22         |
| 22     | 51.55      | CH               | 3.07       | dq (8.0, 6.9) <sup>b</sup> | 42, 21          | 43, 42, 24, 25                        | 42, 20             |
| 23     | 217.46     | C=O              |            |                            |                 |                                       | 43, 42, 24, 22     |
| 24     | 51.00      | CH               | 2.89       | qd (7.0, 5.5) <sup>a</sup> | 43, 25          | 43, 42, 20, 22, 25, 26, 35, 31        | 43, 25             |
| 25     | 74.32      | CH               | 3.89       | t (5.5)                    | 24, 26          | 43, 42, 24, 22, 26                    | 43, 24             |
| 26     | 75.08      | CH               | 5.19       | br d (5.8)                 | 25              | 43, 42, 24, 25                        | 25                 |
| 27     | 171.87     | C=O              |            |                            |                 |                                       | 44, 28, 26         |
| 28     | 58.25      | CH               | 4.29       | dd (7.6, 6.6)              | 44a, 44b        | 45, 35, 31                            | 45, 44, 44         |
| 29     | 198.10     | C=O              |            |                            |                 |                                       | 44, 44, 28, 35, 31 |
| 30     | 138.12     | C                |            |                            |                 |                                       | 34, 32             |
| 33     | 134.77     | CH               | 7.60       | tt (7.4, 1.2)              | 34, 32, 35, 31  |                                       | 35, 31             |
| 34, 32 | 130.10     | 2 CH             | 7.50       | br t (7.8)                 | 33, 35, 31      | 35, 31                                |                    |
| 35, 31 | 129.55     | 2 CH             | 7.99       | br d (7.5)                 | 34, 32, 33      | 24, 28, 34, 32                        | 33                 |
| 36     | 60.79      | OCH <sub>3</sub> | 3.59       | s                          |                 | 42, 37                                |                    |
| 37     | 14.56      | CH <sub>3</sub>  | 1.91       | s                          | 5               | 38, 6, 36, 3                          | 5, 3               |
| 38     | 17.05      | CH <sub>3</sub>  | 1.01       | br d (6.6)                 | 6               | 37, 9, 6, 7, 5                        | 37, 6, 7           |
| 39     | 15.57      | CH <sub>3</sub>  | 0.89       | d (7.0)                    | 8               | 8, 9, 9, 6, 7                         | 7                  |
| 40     | 56.65      | OCH <sub>3</sub> | 3.27       | s                          |                 | 41, 14, 13, 12                        | 14                 |
| 41     | 11.74      | CH <sub>3</sub>  | 1.79       | s                          | 16a, 16b, 17    | 16, 16, 40, 14                        | 17                 |
| 42     | 13.84      | CH <sub>3</sub>  | 1.05       | d (6.9)                    | 22              | 20, 24, 20, 22, 36, 25, 21, 26, 3, 17 | 22                 |
| 43     | 10.512     | CH <sub>3</sub>  | 0.92       | d (7.0)                    | 24              | 24, 22, 25, 26                        | 24, 25             |
| 44a    | 24.28      | CH <sub>2</sub>  | 2.01       | m <sup>c, d</sup>          | 45, 28          |                                       | 45, 28             |
| 44b    |            |                  | 1.95       | m <sup>d</sup>             | 45              |                                       | 45, 28             |
| 45     | 12.55      | CH <sub>3</sub>  | 1.03       | t (7.5)                    | 44a, 44b        | 28                                    | 44, 44, 28         |

<sup>a, b, c, d</sup> overlapping <sup>1</sup>H signals

Table S2. NMR data of lanyamycin **2** in CD<sub>3</sub>OD (<sup>1</sup>H/<sup>13</sup>C NMR at 700.44/176.14 MHz)

| Pos.   | δ <sub>C</sub> | XHn             | δ <sub>H</sub> | H Mult. (J [Hz])                  | H in COSY    | H in N/ROESY              | H to C HMBC        |
|--------|----------------|-----------------|----------------|-----------------------------------|--------------|---------------------------|--------------------|
| 1      | 166.03         | C               |                |                                   |              |                           | 3                  |
| 2      | 143.07         | C               |                |                                   |              |                           | 36, 3              |
| 3      | 133.57         | CH              | 6.55           | d (0.7)                           | -            | 5                         | 37, 5              |
| 4      | 132.62         | C               |                |                                   |              |                           | 37                 |
| 5      | 147.55         | CH              | 5.39           | br d (10.1)                       | 6 >37        | 3, 7 >10, 38, 6, 8        | 38, 37, 6, 7, 3    |
| 6      | 39.67          | CH              | 2.40           | tq (10.0, 6.6)                    | 38, 7, 5     | 37 >39, 5, 8              | 38, 5              |
| 7      | 77.24          | CH              | 3.39           | br d (10.5)                       | 6            | 5, 10 >9a, 8, 38, 6       | 39, 38, 9, 9, 6, 5 |
| 8      | 42.99          | CH              | 1.50           | dqd (9.9, 6.8, 3.0)               | 39, 9a       | 39, 7 >6, 10, 11 >5       | 39, 9, 9, 7        |
| 9a     | 38.78          | CH <sub>2</sub> | 2.05           | m <sup>c</sup>                    | 8, 9b, 10    | 39 >7, 10, 11             | 39, 8, 7, 11, 10   |
| 9b     |                |                 | 1.89           | ddd (12.4, 9.9, 2.0)              | 9a, 10       | 39 >11, 10                | 39, 8, 7, 11, 10   |
| 10     | 138.26         | CH              | 6.17           | ddd (15.3, 9.8, 5.7)              | 9b, 11 >9a   | 7, 12 >5 >8, 9a           | 9, 9, 12           |
| 11     | 132.78         | CH              | 6.03           | dd (15.3, 10.5)                   | 10, 12       | 13 >9b                    | 9, 9, 13, 12       |
| 12     | 139.76         | CH              | 6.51           | dd (15.2, 10.4)                   | 13, 11       | 14, 10 >40                | 14, 11, 10         |
| 13     | 128.99         | CH              | 5.20           | br dd (15.1, 9.5)                 | 12 >14       | 11 >14, 40                | 11                 |
| 14     | 85.77          | CH              | 3.77           | t (9.5)                           | 15, 13       | 40 >12, 16a, 16b, 17      | 16, 40, 15, 12     |
| 15     | 75.84          | CH              | 4.83           | ddd (10.1, 6.5, 3.7)              | 14 >16a, 16b | 16a, 16b, 14, 17          | 16, 16, 14, 13, 17 |
| 16a    | 33.20          | CH <sub>2</sub> | 2.88           | m <sup>a</sup>                    | 16, 15, 17   | 15, 41, 14, 17            | 14, 17             |
| 16b    |                |                 | 2.81           | ddd (15.7, 8.8, 6.9) <sup>b</sup> | 16, 15, 17   | 41, 14, 17, 15            | 14, 17             |
| 17     | 140.16         | CH              | 6.85           | ddq (8.6, 6.2, 1.3)               | 16a, 16b >41 | 20a, 20b >15, 21, 14, 16a | 16                 |
| 18     | 140.58         | C               |                |                                   |              |                           | 41, 16             |
| 19     | 202.53         | C               |                |                                   |              |                           | 41, 20, 20, 21, 17 |
| 20a    | 43.35          | CH <sub>2</sub> | 2.98           | dd (15.5, 3.0)                    | 20b, 21      | 20b, 21, 17 >42           | 22                 |
| 20b    |                |                 | 2.78           | dd (15.7, 9.3) <sup>b</sup>       | 20a, 21      | 20a, 24 >17 >21           | 22                 |
| 21     | 72.10          | CH              | 4.25           | ddd (9.2, 8.0, 3.0)               | 20a, 20b, 22 | 42, 20a, 24, 22, 17       | 42, 20, 20, 22     |
| 22     | 51.98          | CH              | 3.06           | dq (7.8, 7.0)                     | 42 >21       | 42 >24, 25, 21            | 42, 20             |
| 23     | 217.63         | C               |                |                                   |              |                           | 42, 24, 22, 25, 21 |
| 24     | 50.73          | CH              | 2.91           | qd (6.9, 5.8) <sup>a</sup>        | 43, 25       | 42 >22, 25 >26            | 25                 |
| 25     | 74.52          | CH              | 3.85           | t (5.5)                           | 24, 26       | 43, 24, 22, 26            | 43, 24, 26         |
| 26     | 75.03          | CH              | 5.22           | d (5.2)                           | 25           | 43, 25 >24                | 25                 |
| 27     | 171.66         | C               |                |                                   |              |                           | 44, 44, 28, 26     |
| 28     | 58.29          | CH              | 4.34           | dd (7.7, 6.7)                     | 44, 44       | 31/35, 44a, 44b >45       | 45, 44, 44         |
| 29     | 198.19         | C               |                |                                   |              |                           | 44, 44, 28, 31, 35 |
| 30     | 138.15         | C               |                |                                   |              |                           | 32, 34             |
| 31, 35 | 129.76         | CH              | 8.06           | dd (8.4, 1.3)                     | 32/34, 33    | 32/34 >28                 | 33                 |
| 32, 34 | 130.06         | CH              | 7.53           | td (7.5, 1.6)                     | 33, 31/35    | 31/35, 33                 |                    |
| 33     | 134.81         | CH              | 7.63           | tt (7.3, 1.3)                     | 32/34 >31/35 | 32/34                     | 32, 34, 31, 35     |
| 36     | 60.77          | CH <sub>3</sub> | 3.61           | s                                 | -            | 37                        | 3                  |
| 37     | 14.57          | CH <sub>3</sub> | 1.92           | d (1.1)                           | 5            | 38, 6, 3                  | 5, 3               |
| 38     | 17.06          | CH <sub>3</sub> | 1.03           | br d (6.7)                        | 6            | 37, 7, 5                  | 37, 6, 7, 5        |
| 39     | 15.57          | CH <sub>3</sub> | 0.90           | d (7.1)                           | 8            | 8 >9a, 9b, 6              | 8, 7               |
| 40     | 56.67          | CH <sub>3</sub> | 3.29           | s                                 | -            | 14 >13, 12, 41            | 14                 |
| 41     | 11.74          | CH <sub>3</sub> | 1.81           | br s                              | 17           | 16a, 16b, 40              | 17                 |
| 42     | 13.71          | CH <sub>3</sub> | 1.06           | d (7.1)                           | 22           | 24, 20', 22, 21           | 22, 21             |
| 43     | 11.28          | CH <sub>3</sub> | 1.07           | d (6.9)                           | 24           | 25, 26                    | 24, 25             |
| 44a    | 24.62          | CH <sub>2</sub> | 2.03           | m <sup>c</sup>                    | 45, 44b, 28  | 28                        | 45, 28             |
| 44b    |                |                 | 1.97           | s                                 | 45, 44b, 28  | 28                        | 45, 28             |
| 45     | 12.57          | CH <sub>3</sub> | 1.02           | t (7.2)                           | 44, 44       | 28                        | 44, 44, 28         |
|        |                |                 | 4.59           | s                                 |              |                           |                    |

<sup>a, b, c, d</sup> overlapping <sup>1</sup>H signals

Table S3. NMR data of lanyamycin **1/2** in DMSO-*d*<sub>6</sub>. (<sup>1</sup>H/<sup>13</sup>C/<sup>15</sup>N = 700/176/70.99 MHz)

| Pos.      | δ <sub>C(N)</sub>  | m               | δ <sub>H</sub> | m (J [Hz])                | ROESY <sup>b</sup>                        | H to C HMBC          |
|-----------|--------------------|-----------------|----------------|---------------------------|-------------------------------------------|----------------------|
| 1         | 163.34             | C               |                |                           |                                           | 3 >15                |
| 1*        | 163.36             | C               |                |                           |                                           | 3 >15                |
| 2         | 141.12             | C               |                |                           |                                           | 36, 3 >37            |
| 3         | 130.99             | CH              | 6.39           | s                         | 5 >                                       | 37, 5                |
| 3*        | 130.96             | CH              | 6.40           | s                         | 5 >                                       | 37, 5                |
| 4         | 130.07             | C               |                |                           |                                           | 37 >6                |
| 5         | 146.54             | CH              | 5.37           | br d (9.9)                | 3 >7 >38, 8, 10                           | 38, 37, 3 >6, 7      |
| 6         | 38.04              | CH              | 2.23           | tq (9.9, 6.7)             | 38, 37 >39, 8 >7OH                        | 38, 7, 5, 7OH        |
| 7         | 74.31              | CH              | 3.25           | 2x dd (9.9, 6.2)          | 7OH >5, 10, 38 >9a                        | 39, 38, 9a >5 >7OH   |
| 7OH       |                    | OH              | 4.49           | 2x d (6.7)                | 7 >39, 38 >6                              | -                    |
| 8         | 41.35              | CH              | 1.34           | m                         | 39 >9b, 6 >5, 11                          | 39, 9a, 9b, 7OH      |
| 9a        | 37.28              | CH <sub>2</sub> | 1.95           | m                         | 9b, 39, 10 >7, 7OH                        | 39, 7, 11 >10        |
| 9b        |                    | CH <sub>2</sub> | 1.79           | M <sup>f</sup>            | 9a, 11, 39, 8                             |                      |
| 10        | 136.93             | CH              | 6.13           | br ddt (15.3, 9.7, 5.9)   | 12, 9a >5                                 | 11, 12 >9a, 9b       |
| 11        | 130.93             | CH              | 6.01           | dd (15.3, 10.5)           | 9b, 13 >8                                 | 13 >9a, 9b           |
| 12        | 137.74             | CH              | 6.48           | dd (15.3, 10.5)           | 14, 10                                    | 14 >10               |
| 13        | 127.47             | CH              | 5.18           | dd (15.3, 9.5)            | 11, 15 >40                                | 11                   |
| 14*       | 83.59              | CH              | 3.72           | dd (9.3, 8.0)             | 40, 12 >15, 16b                           | 40, 12 >16*b         |
| 14        | 83.54              | CH              | 3.74           | dd (9.3, 8.0)             | 40, 12 >15, 16b                           | 40, 12 >16b          |
| 15*       | 73.69              | CH              | 4.71           | m                         | 16*a, 16*b, 13 >17*                       | 14, 16b >13, 17, 17* |
| 15        | 73.67              | CH              | 4.71           | m                         | 16a, 16b, 13 >17                          |                      |
| 16a, 16*b | 31.69              | CH <sub>2</sub> | 2.77           | m <sup>d</sup>            | overlap 40a/40b                           | 14, 17, 17*          |
| 16b, 16*b |                    | CH <sub>2</sub> | 2.69           | m <sup>w</sup>            | overlap 40a/40b                           | -                    |
| 17        | 137.48             | CH              | 6.69           | ddq (8.2, 6.8, 1.2)       | 20a, 20b, 15 >21                          | 41 >20               |
| 17*       | 137.55             | CH              | 6.72           | ddq (8.0, 6.8, 1.2)       | 20*a, 20*b, 15/15* >21*                   | 41* >20*             |
| 18/18*    | 138.59             | C, C            |                |                           | -                                         | 41, 41*, 16b; 16*b   |
| 19        | 199.87             | C               |                |                           | -                                         | 41 >17 >20b          |
| 19*       | 199.91             | C               |                |                           | -                                         | 41* >17* >20*b       |
| 20a       | 42.22              | CH <sub>2</sub> | 2.78           | m <sup>d</sup>            | overl. with 16a/16b, 24                   | 22, 21OH             |
| 20b       |                    | CH <sub>2</sub> | 2.69           | m                         | overl. with 16a/16b, 24                   | 22, 21OH             |
| 20*a      | 42.40              | CH <sub>2</sub> | 2.79           | m                         | overl. with 16a/16b, 24                   | 22*, 21*OH           |
| 20*b      |                    | CH <sub>2</sub> | 2.73           | m <sup>e</sup>            | overl. with 16a/16b, 24                   | 22*, 21*OH           |
| 21        | 69.78              | CH              | 4.10           | dddd (8.8, 8.0, 5.8, 3.3) | 21OH, 22, 20b >20a                        | 42 >20b, 22 >21OH    |
| 21*       | 70.14              | CH              | 4.13           | dddd (8.4, 8.0, 6.0, 3.4) | 21*OH, 22*, 20*a                          | 42* >20*, 22* >21*OH |
| 21OH      |                    | OH              | 4.77           | d (5.6)                   | 21 >22                                    | -                    |
| 21*OH     |                    | OH              | 4.88           | d (6.0)                   | 21*                                       | -                    |
| 22        | 49.91              | CH              | 2.99           | quin (7.0)                | 42, 25 >21, 21OH                          | 42 >21OH >20b        |
| 22*       | 49.20 <sup>1</sup> | CH              | 3.06           | quin (7.0)                | 42*, 25* >21*, 21*OH                      | 42* >21*OH, 20*b     |
| 23        | 214.61             | C               |                |                           | -                                         | 43, 42 >22 >24       |
| 23*       | 214.29             | C               |                |                           | -                                         | 43* >42*, 22*        |
| 24        | 49.20 <sup>1</sup> | CH              | 2.77           | m <sup>d</sup>            | overl. with 24*, 20a, 16a and 20a*, 16*a  | 43, 25OH             |
| 24*       | 49.58              | CH              | 2.78           | m <sup>d</sup>            | overl. with 24, 20a, 16a and 20*a, 16 a * | 43*, 25*OH           |
| 25        | 72.55              | CH              | 3.70           | br q (5.6)                | 25OH, 22, 24 >43, 28, 26OH, NH            | 43, 26OH >25OH       |
| 25*       | 72.12              | CH              | 3.83           | br dt (4.4, 6.2)          | 25*OH, 22*, 24* >26*, 26*OH, NH*          | 43*, 26*OH >25*OH,   |
| 25OH      |                    | OH              | 4.78           | d (6.0)                   | 25, 43                                    | -                    |
| 25*OH     |                    | OH              | 4.72           | d (5.6)                   | 25* >43*                                  | -                    |
| 26        | 73.15              | CH              | 4.96           | dt (9.1, 5.8)             | 26OH, 43 >25 >>NH                         | 26OH                 |
| 26*       | 73.28              | CH              | 4.91           | ddd (9.2, 6.7, 5.4)       | 26*OH, 43* >25* >>NH*                     | 26*OH                |
| 26OH      |                    | OH              | 5.89           | d (5.6)                   | 26                                        | -                    |
| 26*OH     |                    | OH              | 5.95           | d (5.4)                   | 26*                                       | -                    |
| NH        | (137.82)           | NH              | 8.64           | d (9.3)                   | 28 >31/35, 25 >24, 26                     | -                    |
| NH*       | (138.56)           | NH              | 8.75           | d (9.5)                   | 28* >31*/35*, 25* >24*, 26*               | -                    |
| 27        | 168.33             | C               |                |                           | -                                         | 28, NH, 44a >26*     |
| 27*       | 168.60             | C               |                |                           | -                                         | 28*, NH*, 44*a >26*  |
| 28        | 56.01              | CH              | 4.32           | br t (7.0)                | 31/35, NH >45                             | 45 >44a, 44b         |
| 28*       | 56.14              | CH              | 4.27           | dd (7.3, 6.7)             | 31*/35*, NH* >45                          | 45* >44*b, 44*b      |
| 29        | 195.51             | C               |                |                           | -                                         | 35/31, 28, >44b      |
| 29*       | 195.48             | C               |                |                           | -                                         | 35*/31*, 28* >44*b   |
| 30        | 136.45             | C               |                |                           | -                                         | 34/32                |
| 30*       | 136.26             | C               |                |                           | -                                         | 34*/32*              |
| 33        | 133.17             | CH              | 7.63           | m                         |                                           | 34/32, 35/31         |

|         |                       |                               |                      |                  |
|---------|-----------------------|-------------------------------|----------------------|------------------|
| 33*     | 133.08 CH             | 7.55 m                        |                      | 34*/32*, 35*/31* |
| 34/32   | 128.68 CH             | 7.51 m                        | 35/31                | 34/32            |
| 34*/32* | 128.68 CH             | 7.47 m                        | 35*/31*              | 34*/32*          |
| 35/31   | 128.20 CH             | 8.00 m                        | 32/34, 28            | 33, 35/31        |
| 35*/31* | 127.87 CH             | 7.94 m                        | 32*/34*, 28* >24*    | 33*, 35*/31*     |
| 36      | 59.41 CH <sub>3</sub> | 3.51 2x s                     | 37                   | >>3              |
| 37      | 13.91 CH <sub>3</sub> | 1.82 br s                     |                      | 5, 3             |
| 38      | 16.56 CH <sub>3</sub> | 0.93 d (6.5) <sup>g</sup>     | 6, 37, >7OH >7, 5    | 7                |
| 39      | 15.30 CH <sub>3</sub> | 0.79 d (7.1)                  | 8, 7OH >9b >6,       | 7                |
| 40      | 55.61 CH <sub>3</sub> | 3.19 2x s                     | 14 >13 >12           | 14               |
| 41      | 11.32 CH <sub>3</sub> | 1.69 s                        | 16a/16b, 40          | 17               |
| 41*     | 11.35 CH <sub>3</sub> | 1.71 s                        | 16*a/16*b, 40        | 17*              |
| 42      | 12.49 CH <sub>3</sub> | 0.88 d (6.9) <sup>ac,h</sup>  | 22, 22' overl. 24    | 22               |
| 42*     | 12.68 CH <sub>3</sub> | 0.89 d (6.9) <sup>a,c,t</sup> | 22*, 20*a overl. 24* | 22*              |
| 43      | 9.83 CH <sub>3</sub>  | 0.87 d (6.9) <sup>a,h</sup>   | 25OH, 26, 24         | 24, 25           |
| 43*     | 8.59 CH <sub>3</sub>  | 0.57 d (6.9) <sup>a</sup>     | 26*, 24* >25*OH      | 24*, 25*         |
| 44*a    | 21,80 CH <sub>2</sub> | 1.88 m                        | 45*, 28*             | 45*, 28*         |
| 44*b    | CH <sub>2</sub>       | 1.77 M <sup>f</sup>           | 45*, 28*             |                  |
| 44a     | 22.29 CH <sub>2</sub> | 1.85 M <sup>f</sup>           | 45, 28               | 45, 28           |
| 44b     | CH <sub>2</sub>       | 1.78 m                        | 45, 28               |                  |
| 45      | 11.79 CH <sub>3</sub> | 0.88 t (7.4) <sup>a,h</sup>   | 28                   | 28, 44           |
| 45*     | 11.83 CH <sub>3</sub> | 0.94 t (7.3) <sup>a,g</sup>   | 28*                  | 28*, 44*         |

<sup>a</sup> from *J*res-Spectrum; <sup>b</sup> sorted with decreasing intensity; <sup>c</sup> interchangeable <sup>1</sup>H; <sup>d,e,f,g,h</sup> overlapping <sup>1</sup>H signals

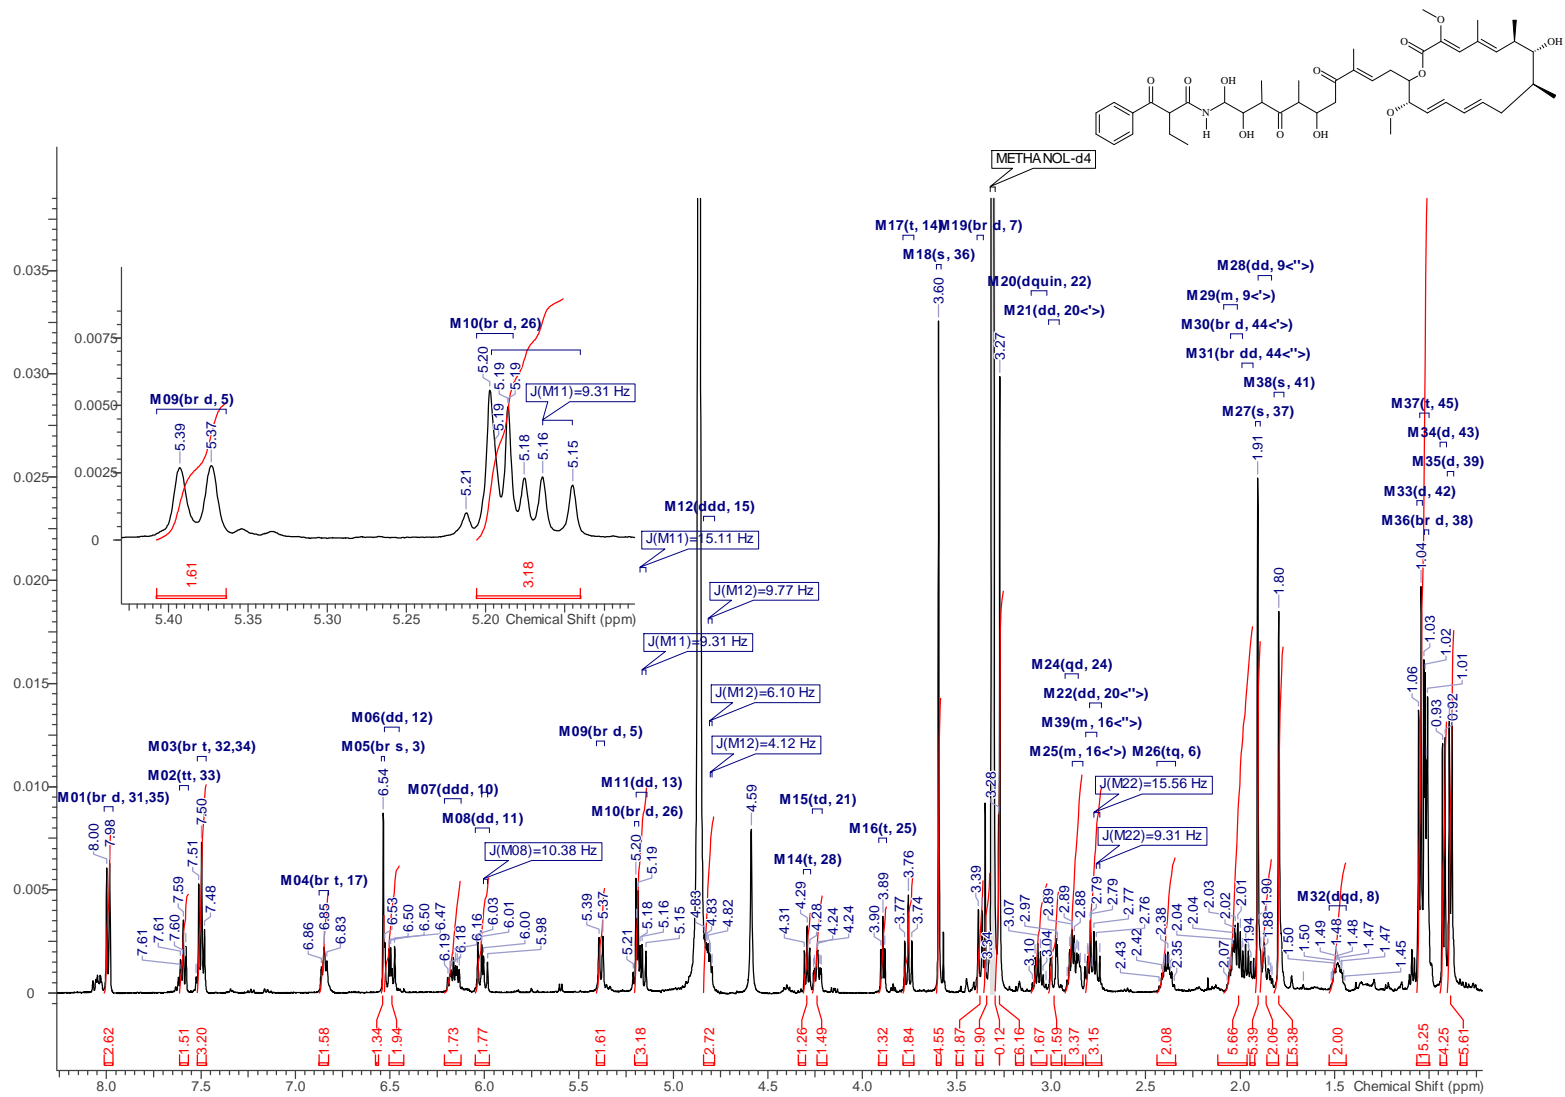

Figure S1. <sup>1</sup>H NMR spectrum of lanyamycin (1) in CD<sub>3</sub>OD (500.3 MHz)

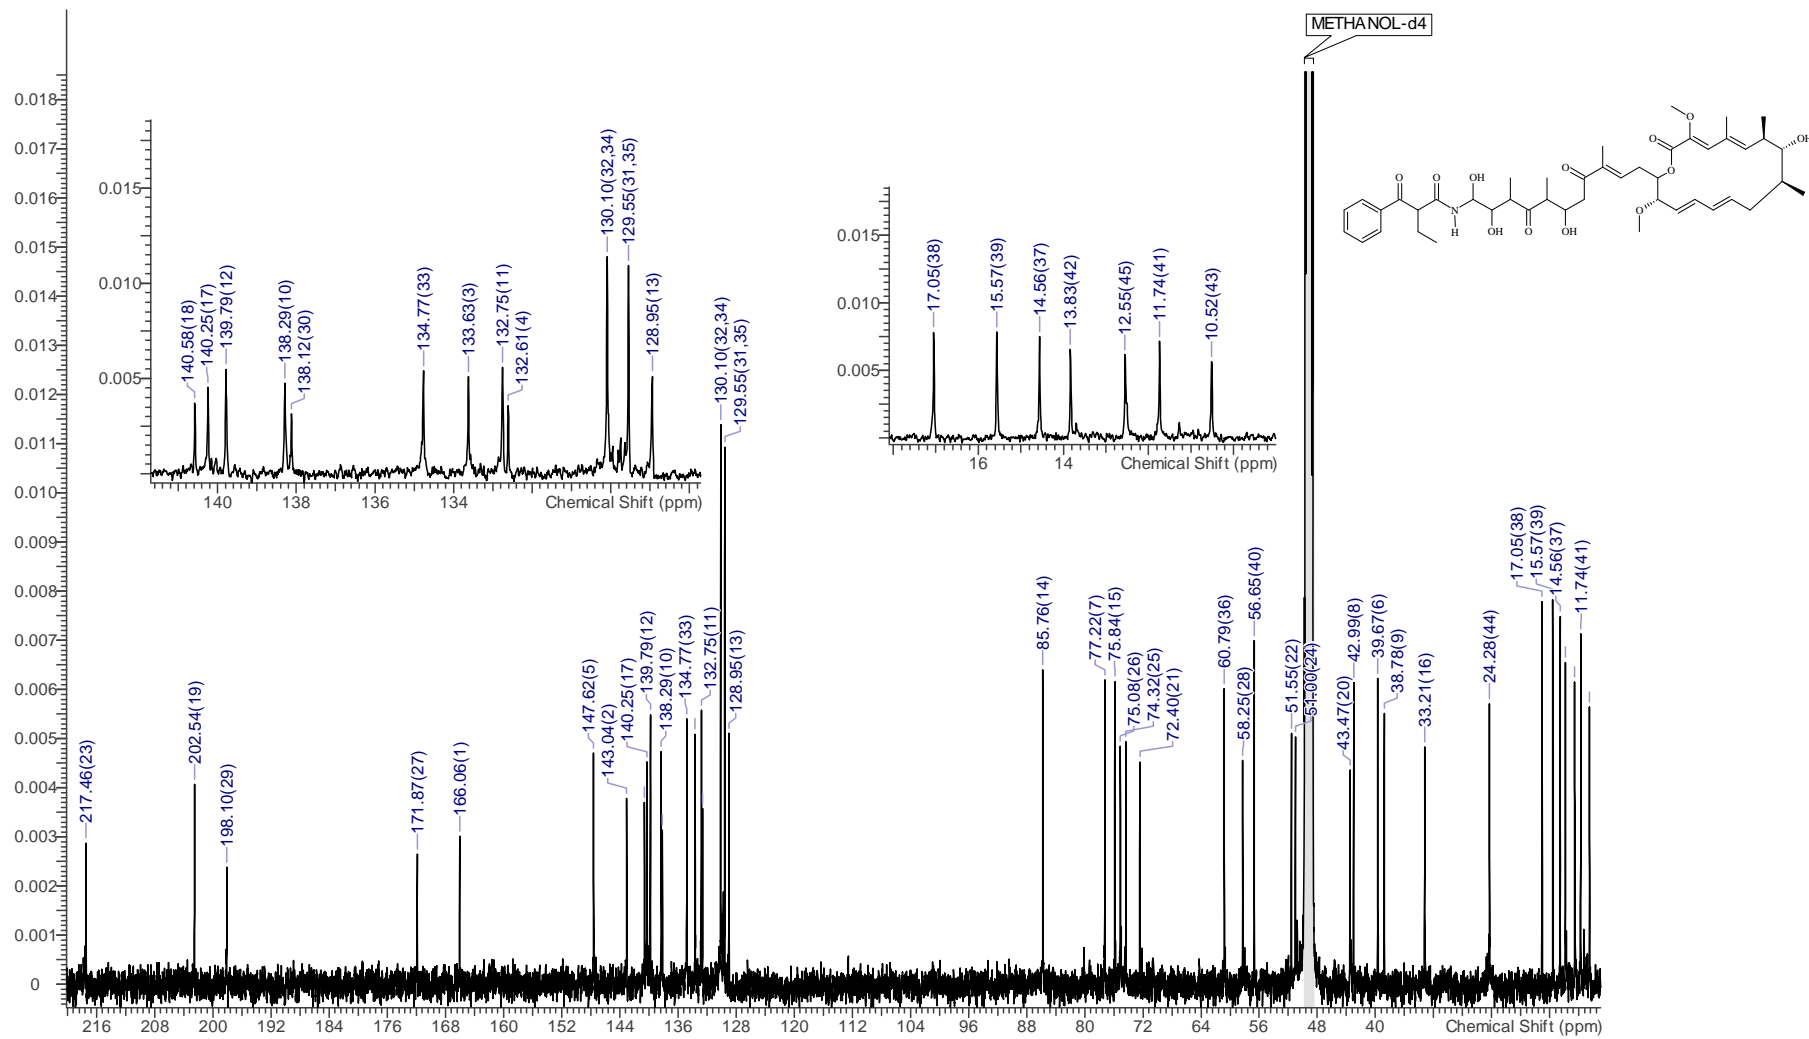

Figure S2.  $^{13}\text{C}$  NMR spectrum of lanyamycin (1) in  $\text{CD}_3\text{OD}$  (125.8 MHz)

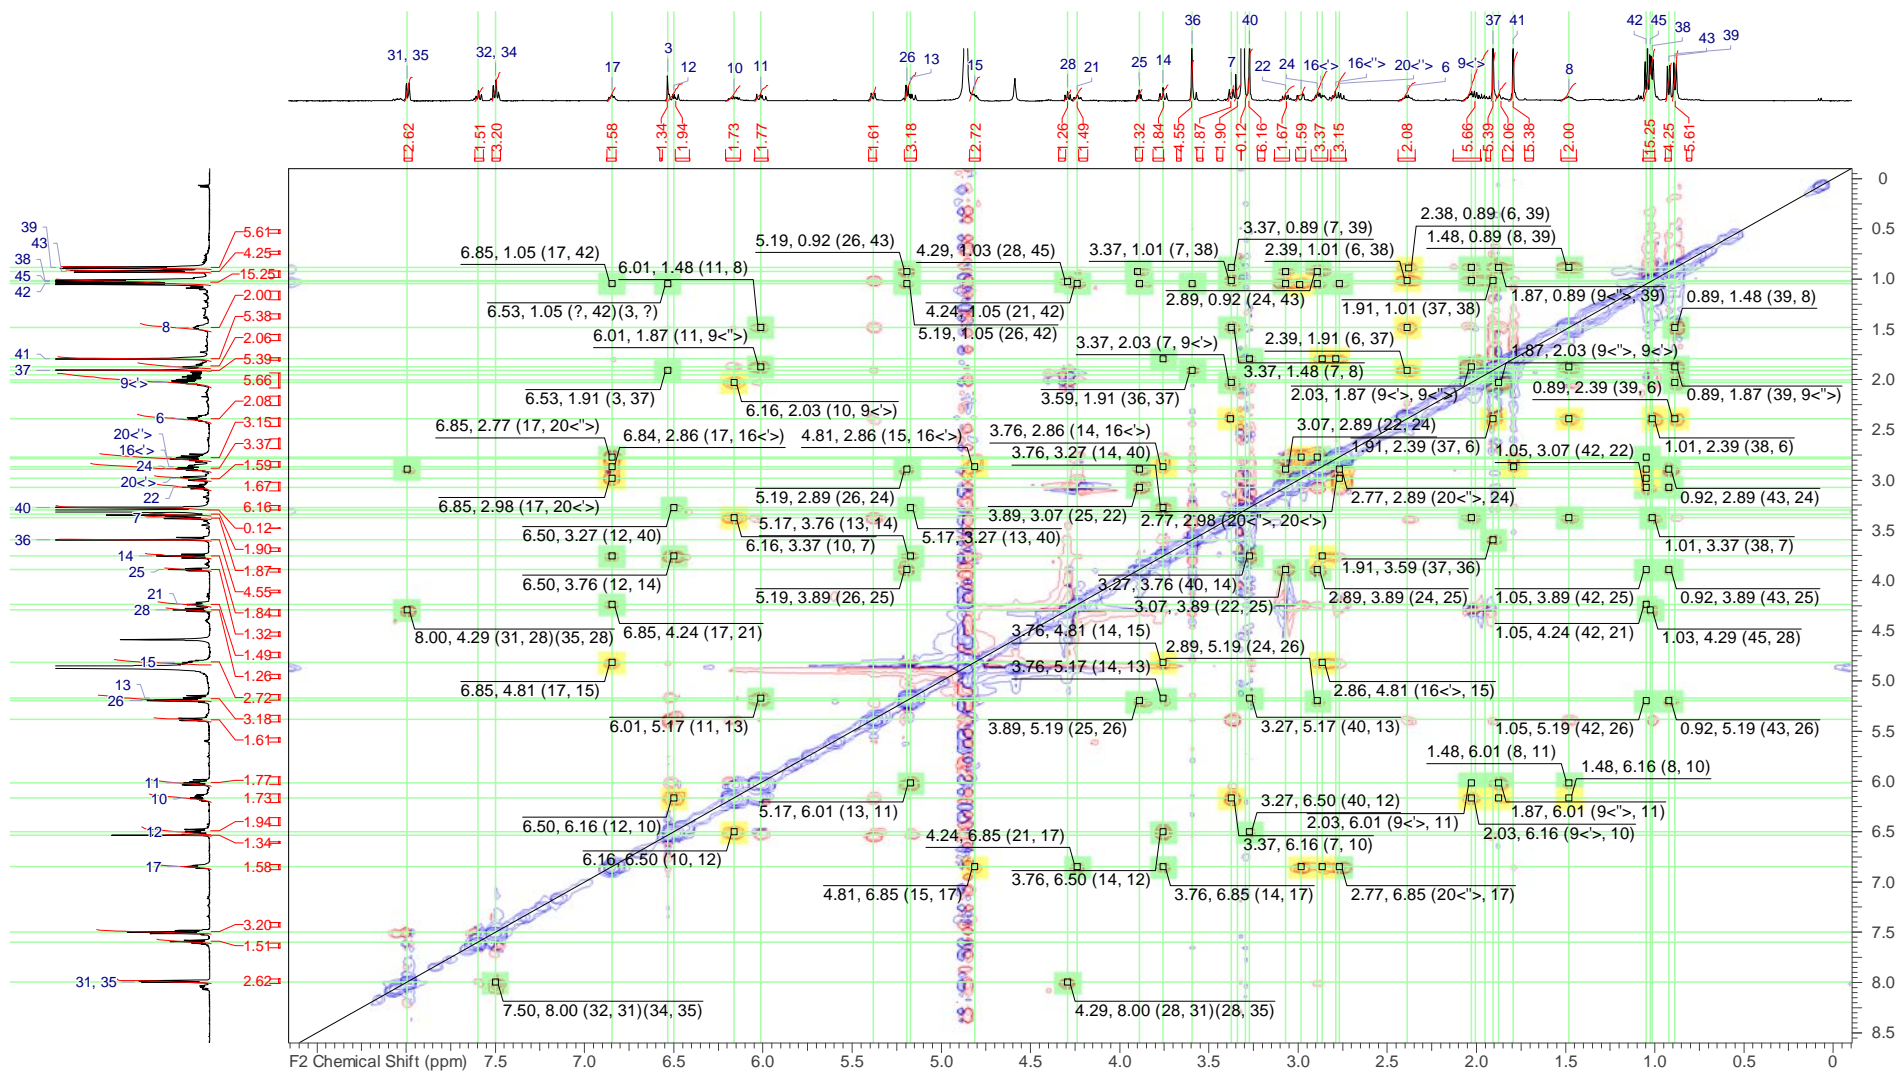

Figure S3. ROESY NMR spectrum of lanyamycin (1) (1H/13C/15N NMR at 500.3/125.8/50.7 MHz)



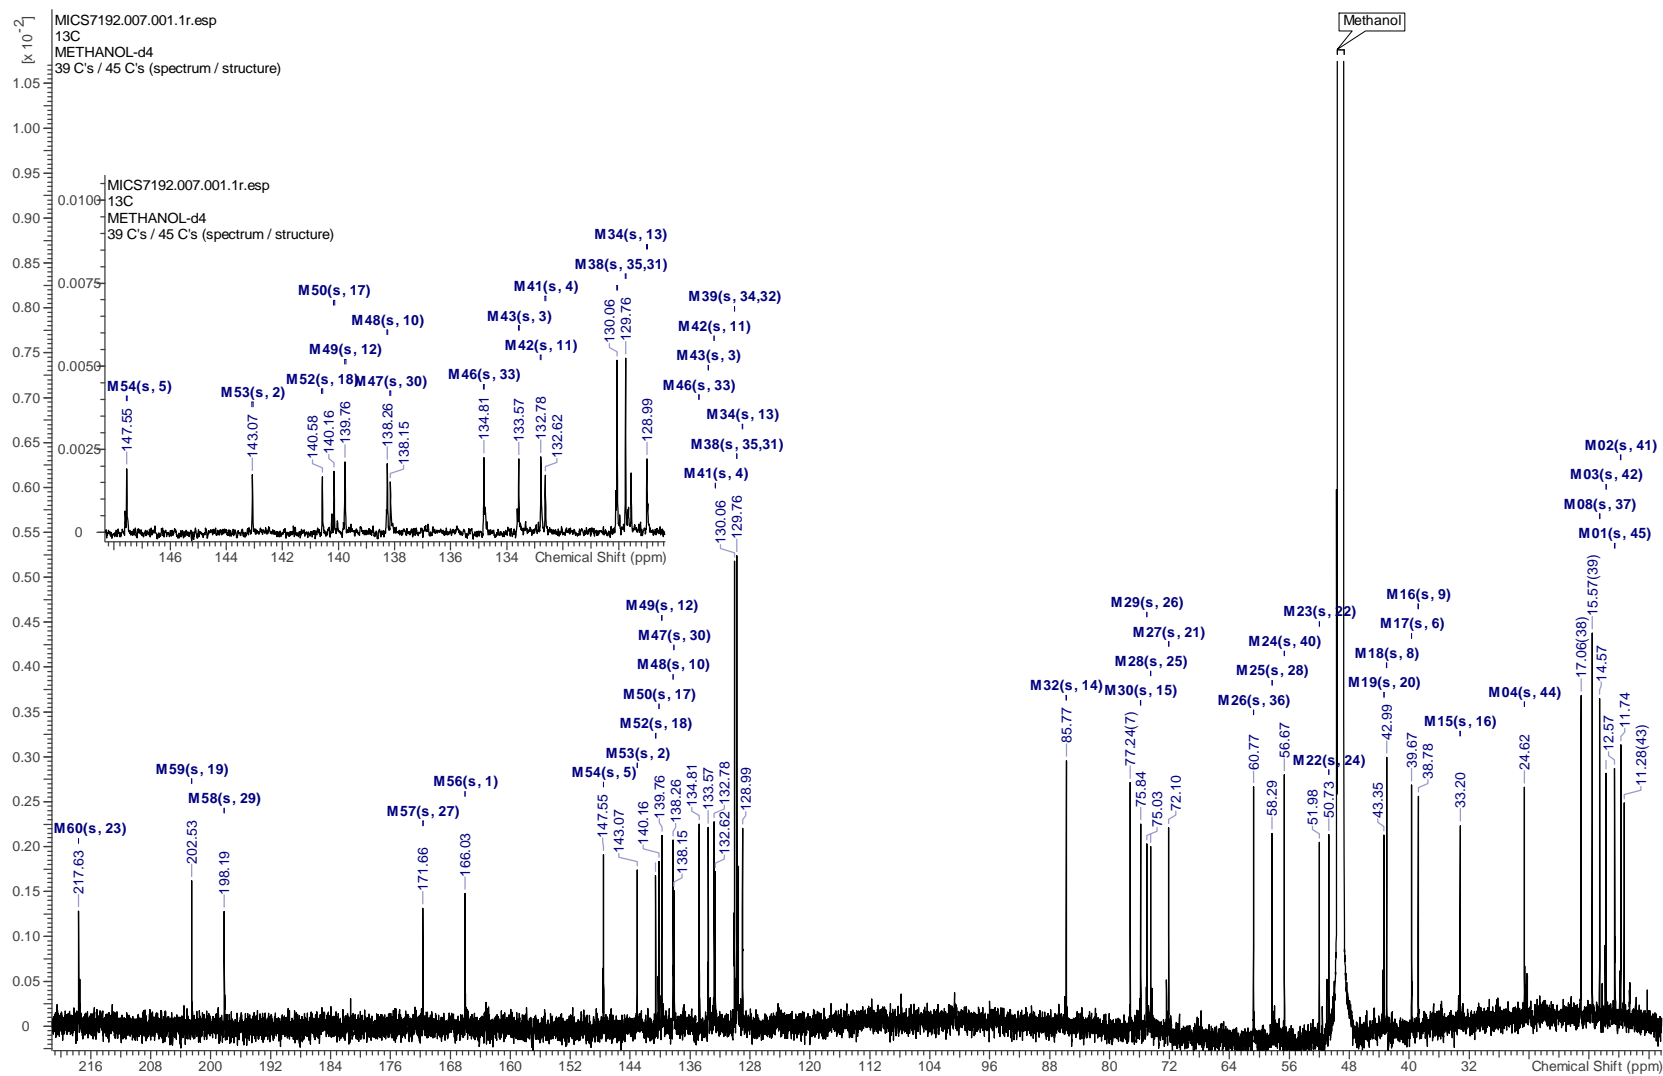

Figure S4.  $^{13}\text{C}$  NMR spectrum of lanyamycin (**2**) in  $\text{CD}_3\text{OD}$  (125.8 MHz)

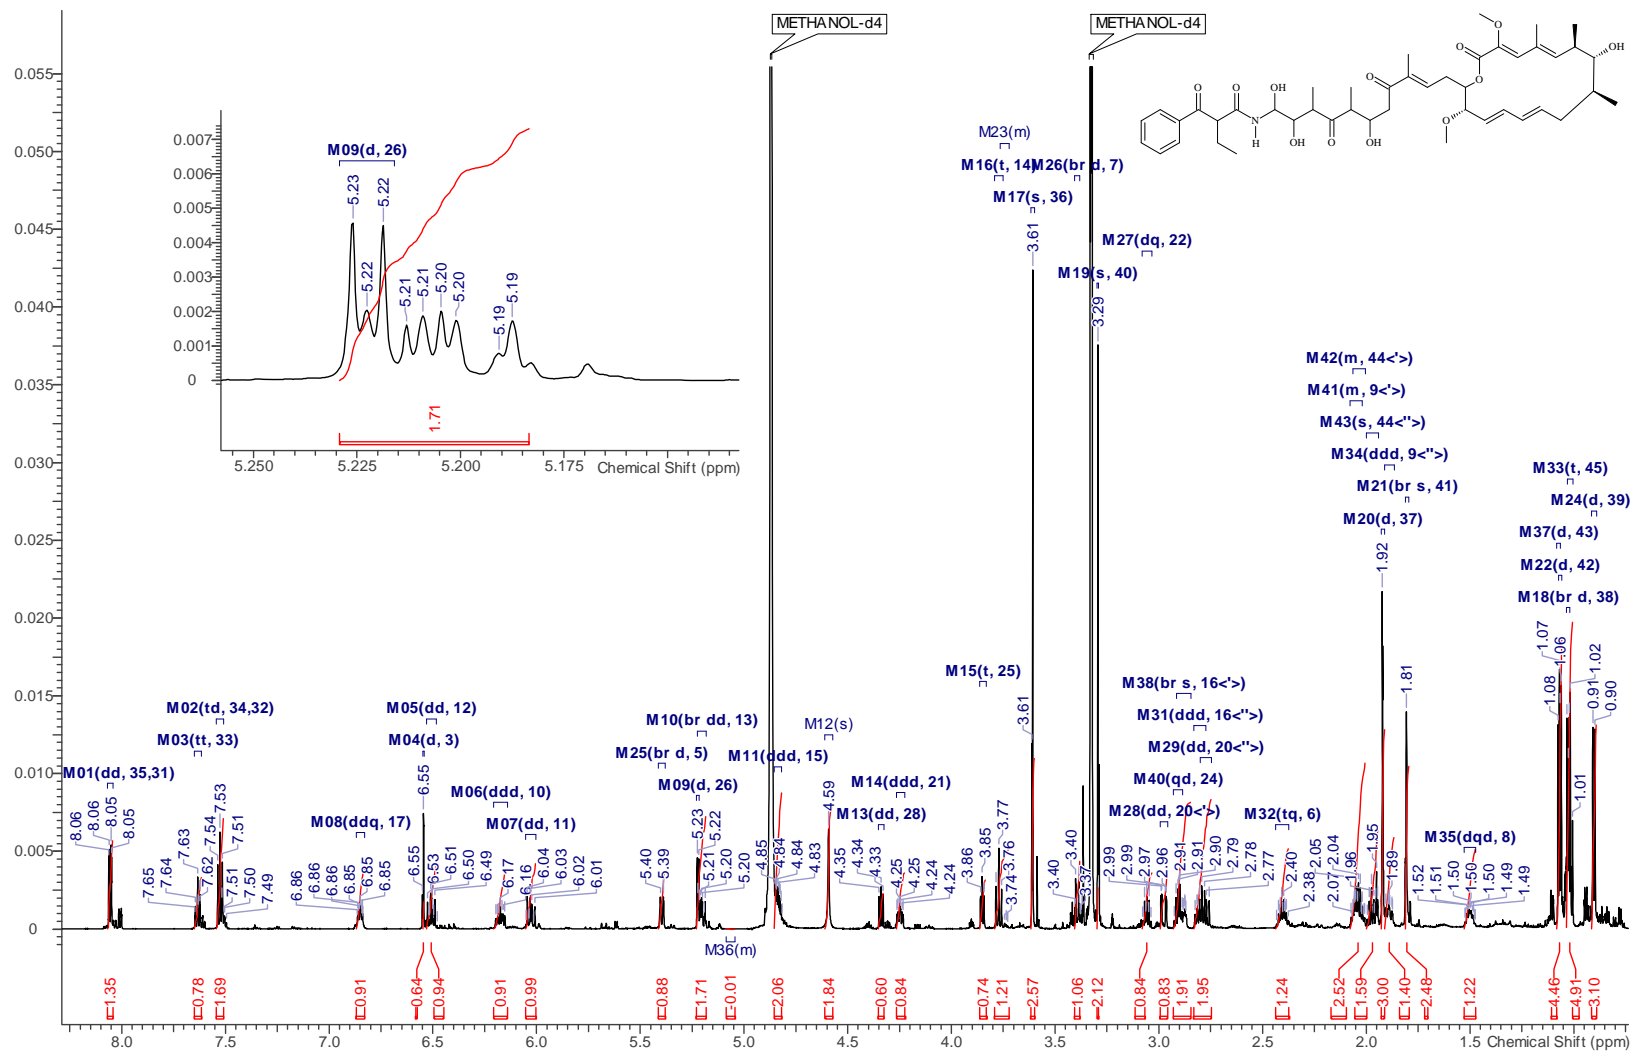

Figure S5. <sup>1</sup>H NMR spectrum of lanyamycin (2) in CD<sub>3</sub>OD (500.3 MHz)

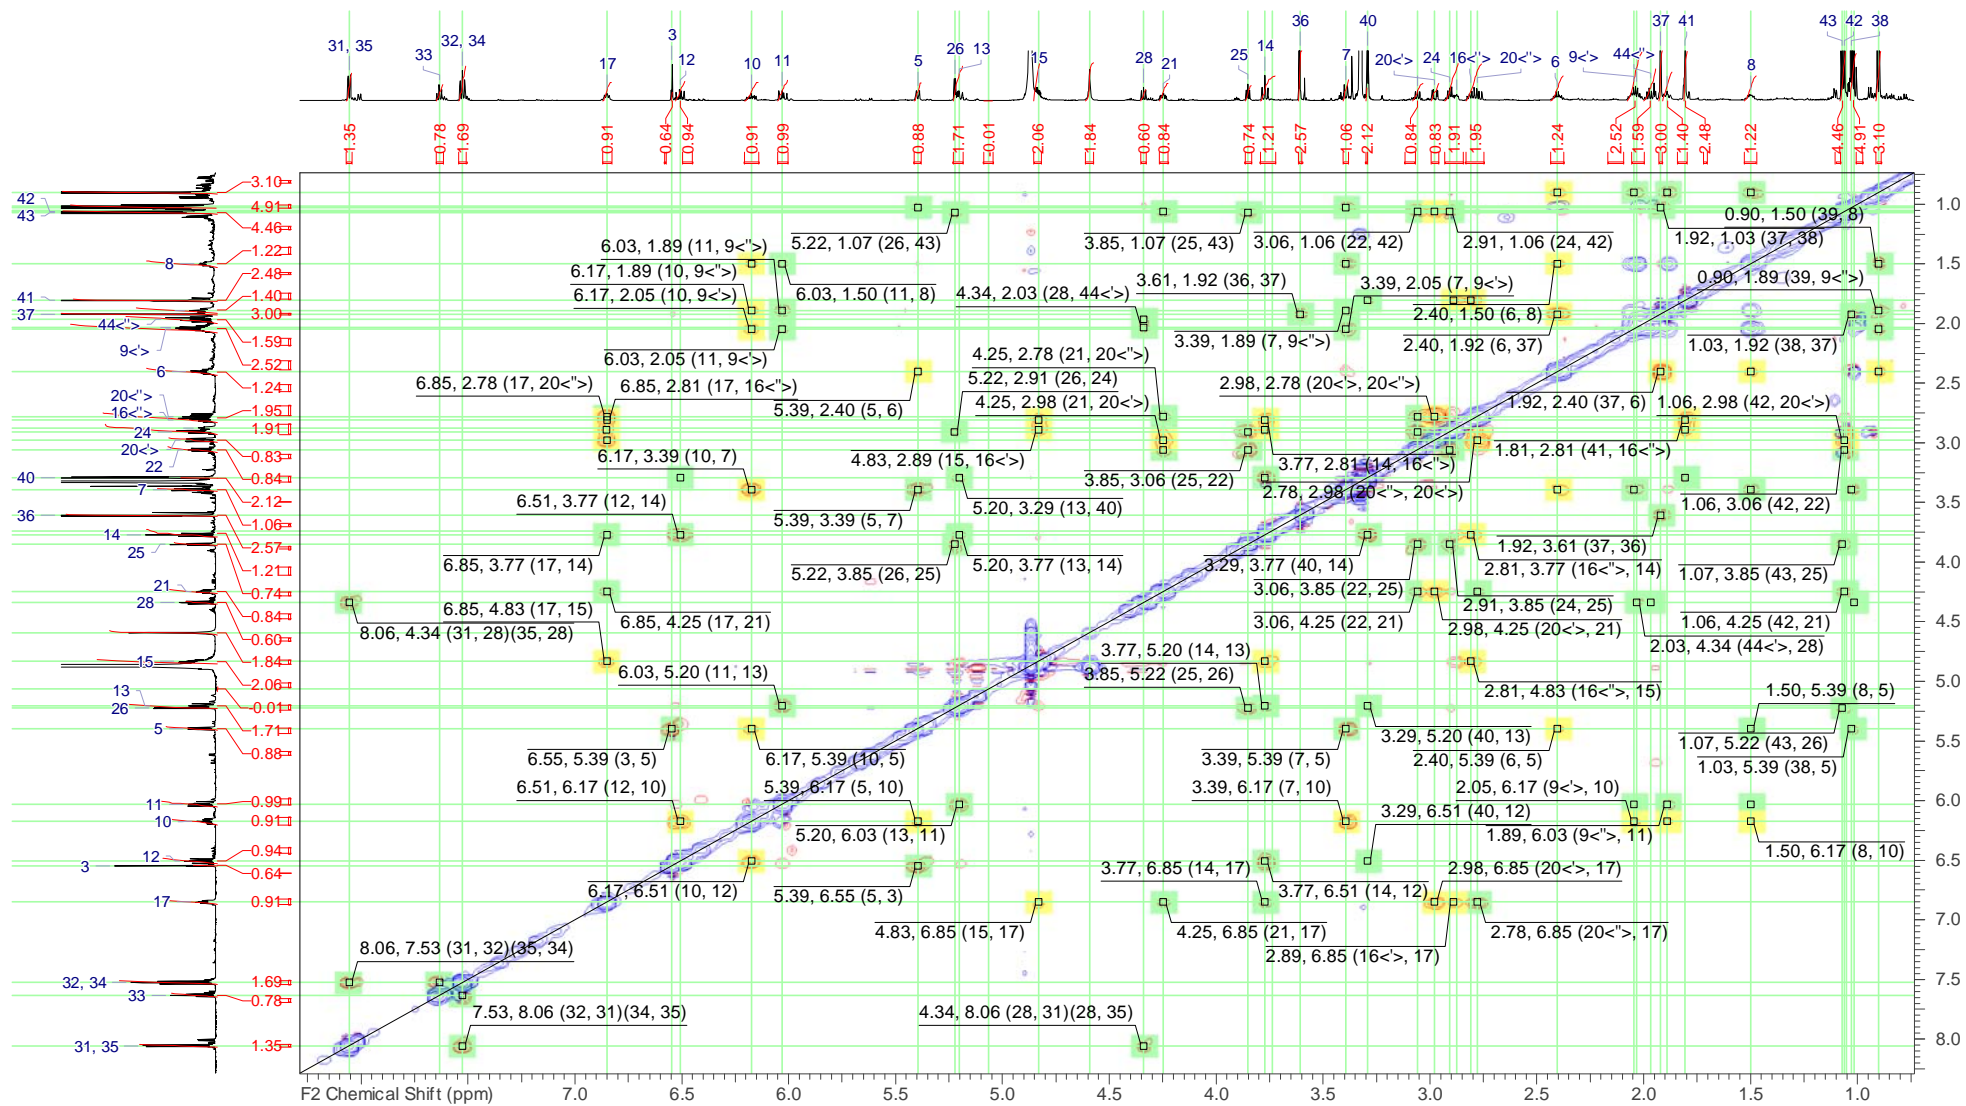

Figure S6. ROESY NMR spectrum of lanyamycin (**2**)

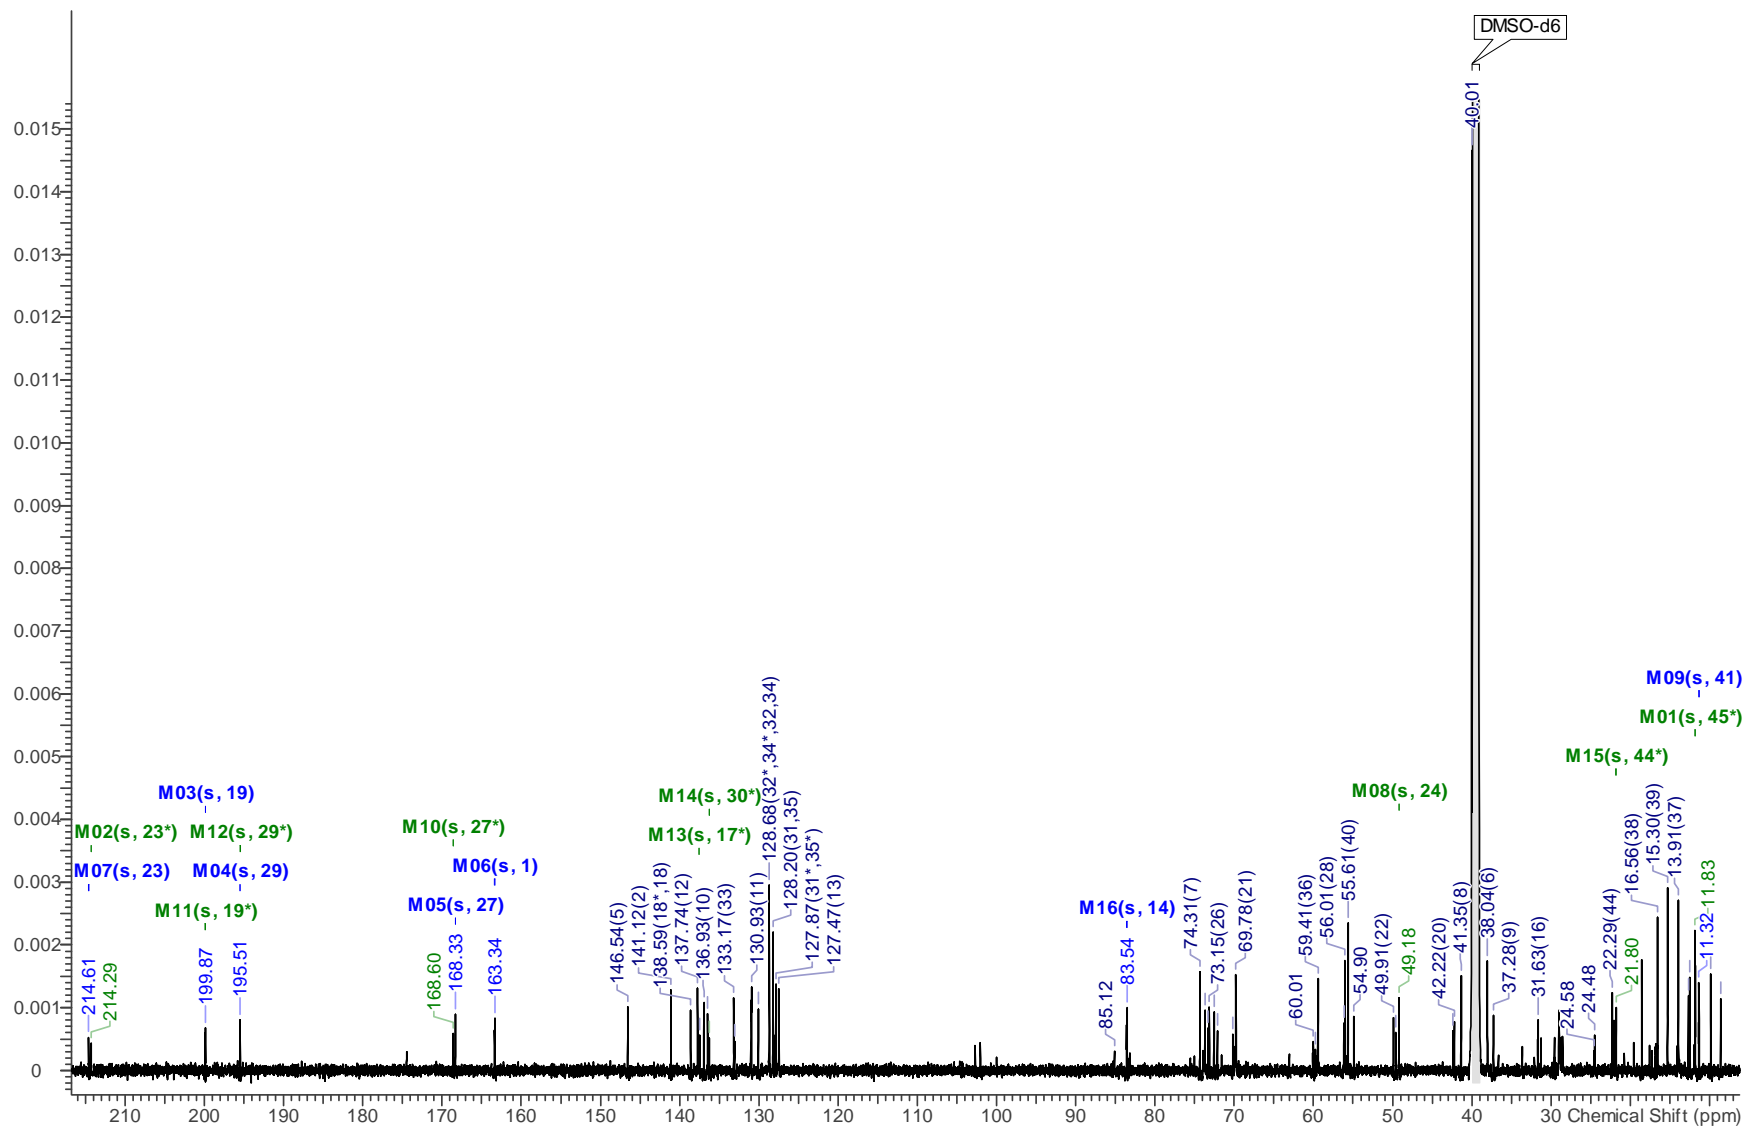

Figure S7. <sup>13</sup>C NMR spectrum of lanyamycin (1/2) in DMSO-d6 (125.8 MHz)

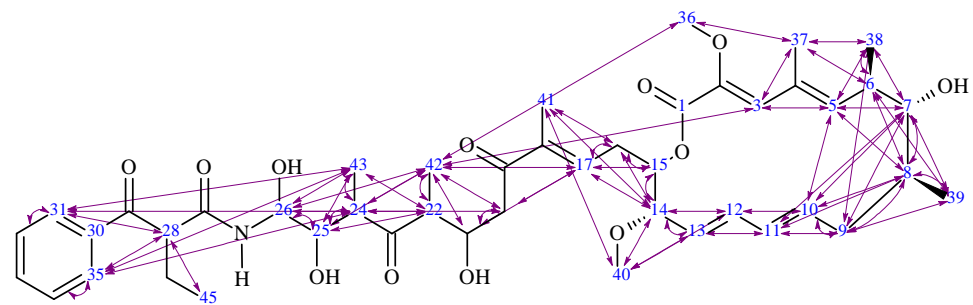

Lanyamycin 1

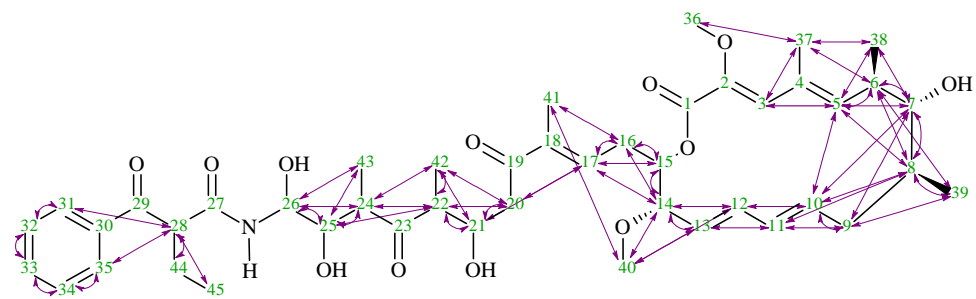

Lanyamycin 2

Figure S8. Comparison of the NOE intensities of lanyamycin 1 and 2

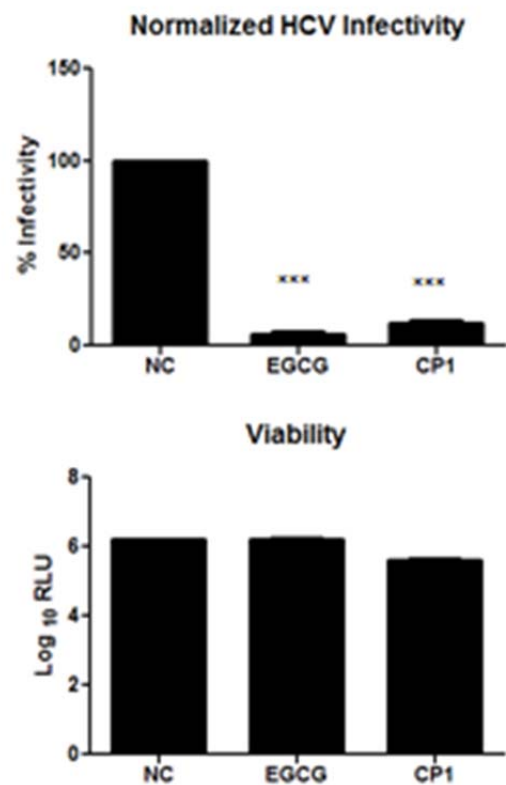

The Assay was performed in quadruplicate and is presented as the mean  $\pm$  standard deviation. \*\*\*  $P \leq 0.05$

Figure S9. Lanyamycin (1/2) effects on HCV infectivity including viability assay

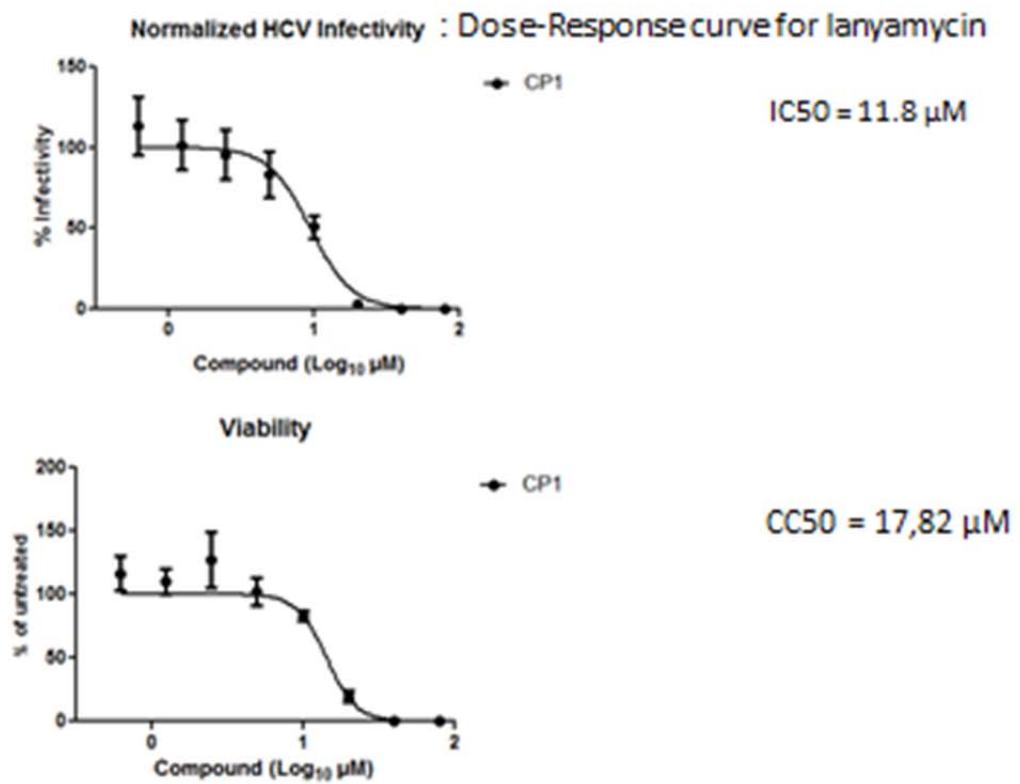

Figure S10. Dose-Response curve for lanyamycin (1/2) HCV infectivity
